# Supplementary material for: Estimating the impact of the 1991 Pinatubo eruption on mesospheric temperature by analyzing HALOE (UARS) temperature data
Source: Copernicus journal article supplement (doi:10.5194/angeo-40-421-2022), 2022-06-23
Supplement: Supplementary file 1 [file angeo-40-421-2022-supplement.zip]

Archive with 2 entries (2 files):
- supplemental_material_final_one_graph.pdf
- angeo-40-421-2022-supplement-title-page.pdf
