# Supplementary material for: Estimating the impact of the 1991 Pinatubo eruption on mesospheric temperature by analyzing HALOE (UARS) temperature data
Source: Copernicus journal article supplement (doi:10.5194/angeo-40-421-2022), 2022-06-23
Supplement: Supplementary file 1 [file angeo-40-421-2022-supplement.zip › angeo-40-421-2022-supplement-title-page.pdf]

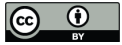

*Supplement of*

**Estimating the impact of the 1991 Pinatubo eruption on mesospheric temperature by analyzing HALOE (UARS) temperature data**

**Sandra Wallis et al.**

*Correspondence to:* Sandra Wallis ([sandra.wallis@uni-greifswald.de](mailto:sandra.wallis@uni-greifswald.de))

- [angeo-40-421-2022-supplement-title-page.pdf](#)
- [supplemental\\_material\\_final\\_one\\_graph.pdf](#)

The copyright of individual parts of the supplement might differ from the article licence.
